# Supplementary material
Source: publisher figshare collection journal article supplement (https://sage.figshare.com/ndownloader/files/38942826)
Supplement: Supplementary file 1 [file 38942826]

**Supplemental Table 1: OECD-DAC CRS Purpose Codes Used to Identify Universe of Potentially Nutrition-sensitive Projects**

AidData developed a list of nutrition-relevant purpose codes to filter all 2010 projects in the OECD-DAC CRS database. The justification for the inclusion of purpose codes on this list was based on the UNICEF framework, and updated in the 2008 lancet Series and through consultations between AidData, officials from Foreign Affairs, Trade and Development Canada, and their donor counterparts. A total of 31 purpose codes from the following categories were selected to build the pool of potentially nutrition-sensitive projects: increasing food availability, increasing food accessibility, improving public health, water, and sanitation, improving the care environment and gender roles/empowerment of women, and general budget support. General budget support was included as much of the “nutrition governance” work that occurs under the aegis of the Scaling Up Nutrition Movement is given to recipient countries in this spending category.

| **Food Security and Agriculture:**  *Availability*  31110 agricultural policy and administrative management  31120 agricultural development  31150 agricultural inputs  31161 food crop production  31163 livestock  31166 agricultural extension  31181 agricultural education/training  31182 agricultural research  31191 agricultural services  31193 agricultural financial services  31194 agricultural co-operatives  31310 fishing policy and administrative management  31320 fishery development  31381 fishery education and training  43040 rural development  *Accessibility*  16010 social welfare services  52010 food aid/food security programs  72040 humanitarian/emergency relief | **Public Health and Water and Sanitation**  *Public Health (including reproductive health)*  12110 health policy and administrative management  12220 basic health care  12250 infectious disease control  12261 health education  12281 health personnel development  13020 reproductive health care  *Sanitation*  14030 basic drinking water supply and sanitation  14032 basic sanitation  *Drinking Water*  14030 basic drinking water supply and basic sanitation  14031 basic drinking water supply |
| --- | --- |
| **Care Environment**  *Gender Empowerment*  15170 women’s equality organizations and institutions |
| **Other**  51010 general budget support |

**Supplemental Table 2: Nutrition Relevant Keywords Used to Identify Nutrition-sensitive Projects**

Given that the OECD-DAC CRS Purpose Code list was not exhaustive of all sectors and investments that could be nutrition-sensitive, a keyword list was used to identify projects that had a reasonable likelihood of being classified as nutrition-sensitive but fell outside of the selected list of purpose codes. Any additional projects identified through the keyword search were added to the existing pool of projects formed with the selected purpose codes. For all 2010 projects, the project titles, short descriptions, and long descriptions were queried for the keywords in the first row of the table below.

Records with one or more potential nutrition activity code were only determined to be nutrition-sensitive if a nutrition relevant keyword was also present. General nutrition keywords were eliminated to avoid references to nutrition as part of a broad strategy rather than specific activities and keywords for feeding activities were also added.

| Nutrition Relevant Keywords Used to Identify Universe of Potentially Nutrition-sensitive Projects (See Step 1) | aflatoxin; biofortification; breastfeeding; cash transfer; CMAM; community management of acute malnutrition; deworming; diarrheal disease; diet; dietary diversification; enteropathy; feeding; food intake; food security; food subsidy; food voucher; fortification; GAM; global acute malnutrition; garden; gastrointestinal illness; global nutrition coordination; growth monitoring; growth monitoring and promotion; handwashing; helminth; hunger; hygiene; IUGR; intrauterine growth restriction; iodine; iron-folic acid; iron folic acid; low birthweight; MAM; mineral; moderate acute malnutrition; malnutrition; micronutrient; nutrition; nutrition education; ready to use therapeutic food; ready-to-use therapeutic food; ready-to-use-therapeutic-food; RUTF; SAM; severe acute malnutrition; Scaling Up Nutrition; stunting; supplement; supplementation; under nutrition; undernutrition; under-nutrition; under weight ; underweight; under-weight; vitamin; wasting; zinc |
| --- | --- |
| Nutrition Relevant Keywords Used with Activity Codes to Identify Nutrition-sensitive Project Transactions (See Step 3.2) | aflatoxin; biofortification; breastfeeding; child feeding; CMAM; community management of acute malnutrition; deworming; diarrheal disease; diet; dietary diversification; direct feeding; enteropathy; feeding program; feeding program; food intake; fortification; GAM; global acute malnutrition; garden; gastrointestinal illness; global nutrition coordination; growth monitoring; growth monitoring and promotion; hand washing; helminth; IUGR; intrauterine growth restriction; iodine; iron-folic acid; iron folic acid; low birth weight; maternal feeding; MAM; moderate acute malnutrition; malnutrition; micronutrient; nutrition education; ready to use therapeutic food; ready-to-use therapeutic food; ready-to-use-therapeutic-food; RUTF; SAM; severe acute malnutrition; Scaling Up Nutrition; school feeding; stunting; supplementation; under nutrition; undernutrition; under-nutrition; under weight ; underweight; under-weight; vitamin; wasting; zinc |
